# Supplementary material for: Ultrafast sensitivity-controlled and specific detection of extracellular vesicles using optical force with antibody-modified microparticles in a microflow system
Source: Royal Society of Chemistry journal article supplement (doi:10.1039/d2nh00576j), 2023-01-01
Supplement: d2nh00576j1.pdf [file d2nh00576j1.pdf]

## ELECTRONIC SUPPLEMENTARY INFORMATION

# Ultrafast Sensitivity-Controlled and Specific Detection of Extracellular Vesicles Using Optical Force with Antibody-modified Microparticles in a Microflow System

Kana Fujiwara<sup>a,b,c,#</sup>, Yumiko Takagi<sup>a,b#</sup>, Mamoru Tamura<sup>b,d</sup>, Mika Omura<sup>b,e</sup>, Kenta Morimoto,<sup>b,e</sup>  
Ikuhiko Nakase<sup>b,e,\*</sup>, Shiho Tokonami<sup>b,c,\*</sup>, Takuya Iida<sup>a,b,\*</sup>

<sup>a</sup>Department of Physics, Graduate School of Science, Osaka Metropolitan University, 1-2 Gakuen-cho, Naka-ku, Sakai, Osaka 599-8570, Japan.

<sup>b</sup>Research Institute for Light-induced Acceleration System (RILACS), Osaka Metropolitan University, 1-2 Gakuen-cho, Naka-ku, Sakai, Osaka 599-8570, Japan.

<sup>c</sup>Department of Applied Chemistry, Graduate School of Engineering, Osaka Metropolitan University, 1-2 Gakuen-cho, Naka-ku, Sakai, Osaka 599-8570, Japan.

<sup>d</sup>Department of Materials Engineering Science, Graduate School of Engineering Science, Osaka University, 1-3 Machikaneyama-cho, Toyonaka, Osaka 560-8531, Japan

<sup>e</sup>Department of Biological Chemistry, Graduate School of Science, Osaka Metropolitan University, 1-2 Gakuen-cho, Naka-ku, Sakai, Osaka 599-8570, Japan.

\*Correspondence to: [t-iida@omu.ac.jp](mailto:t-iida@omu.ac.jp) (T.I.); [tokonami@omu.ac.jp](mailto:tokonami@omu.ac.jp) (S.T.); [i-nakase@omu.ac.jp](mailto:i-nakase@omu.ac.jp) (I.N.)

#These authors contributed equally to this work.

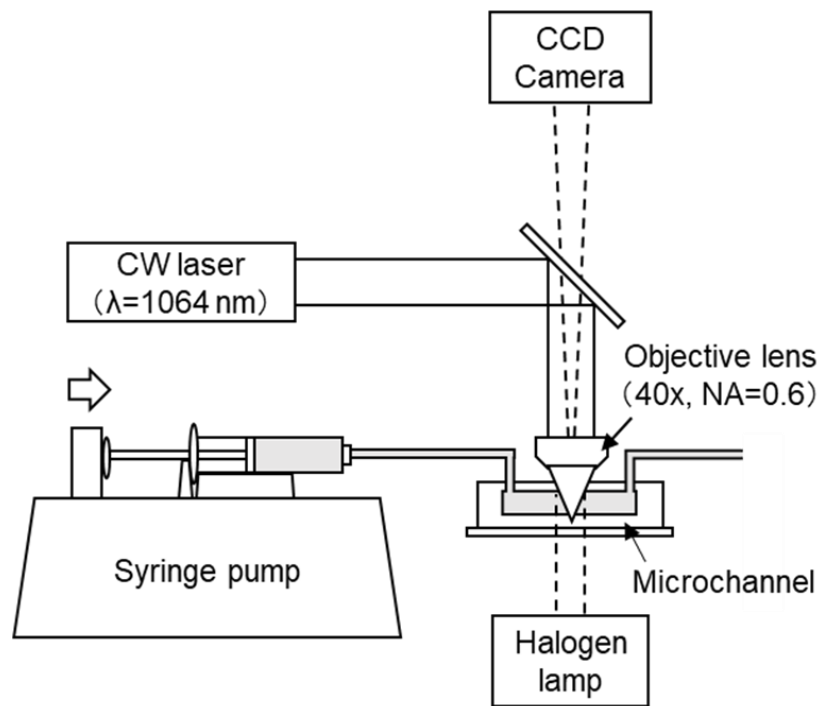

**Figure S1. Microflow-type optical condensation system.** Schematic diagram of the optical system used in this study.

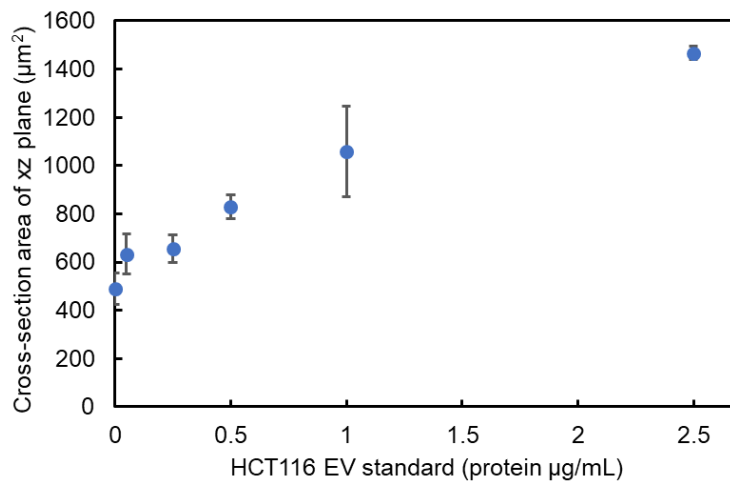

**Figure S2. Calibration curve obtained by confocal imaging after the light-induced assembly.** HCT116-derived nanoscale EV concentration dependence of xz-cross-section areas of the assembled structure in three-dimensional confocal images of Fig. 2b.

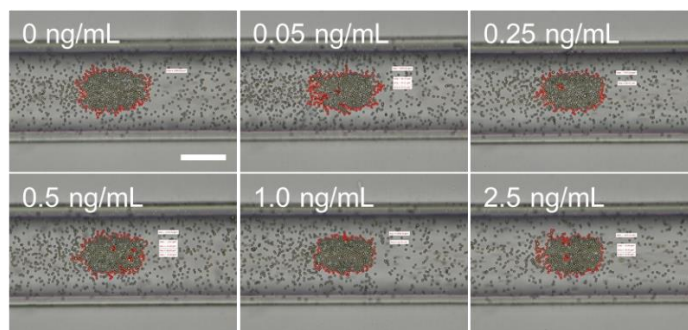

**Figure S3. Transmission images of the negative control established using another type of protein.** Transmission images of light-induced assembly without and with calnexin. Each concentration of calnexin is shown in the upper left section of the image, and the scale bar is 50  $\mu\text{m}$ .

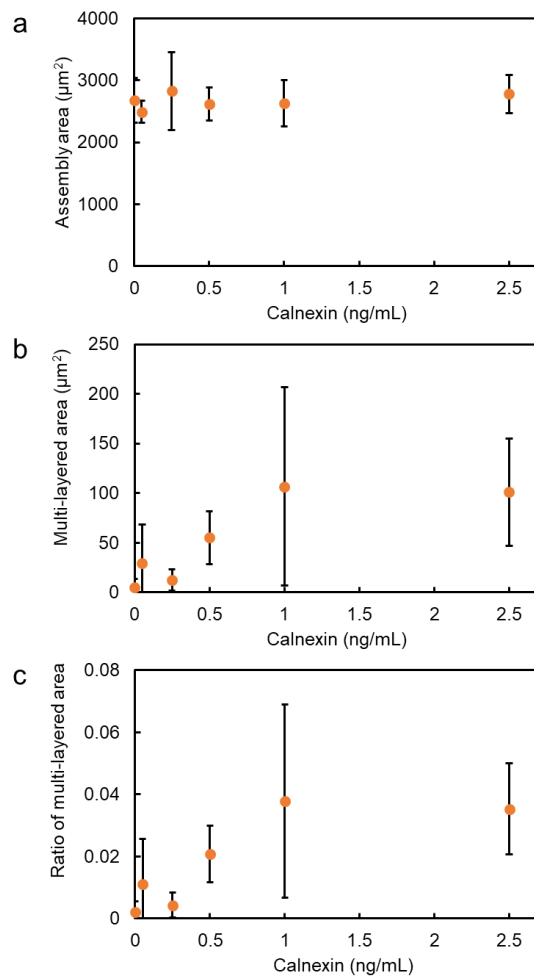

**Figure S4. Concentration detection in the negative control established using another type of protein.** Dependence of calnexin concentration on the (a) assembly area, (b) multi-layered area, and (c) ratio of the multi-layered area. Error bars present standard deviations ( $n = 3$ ).

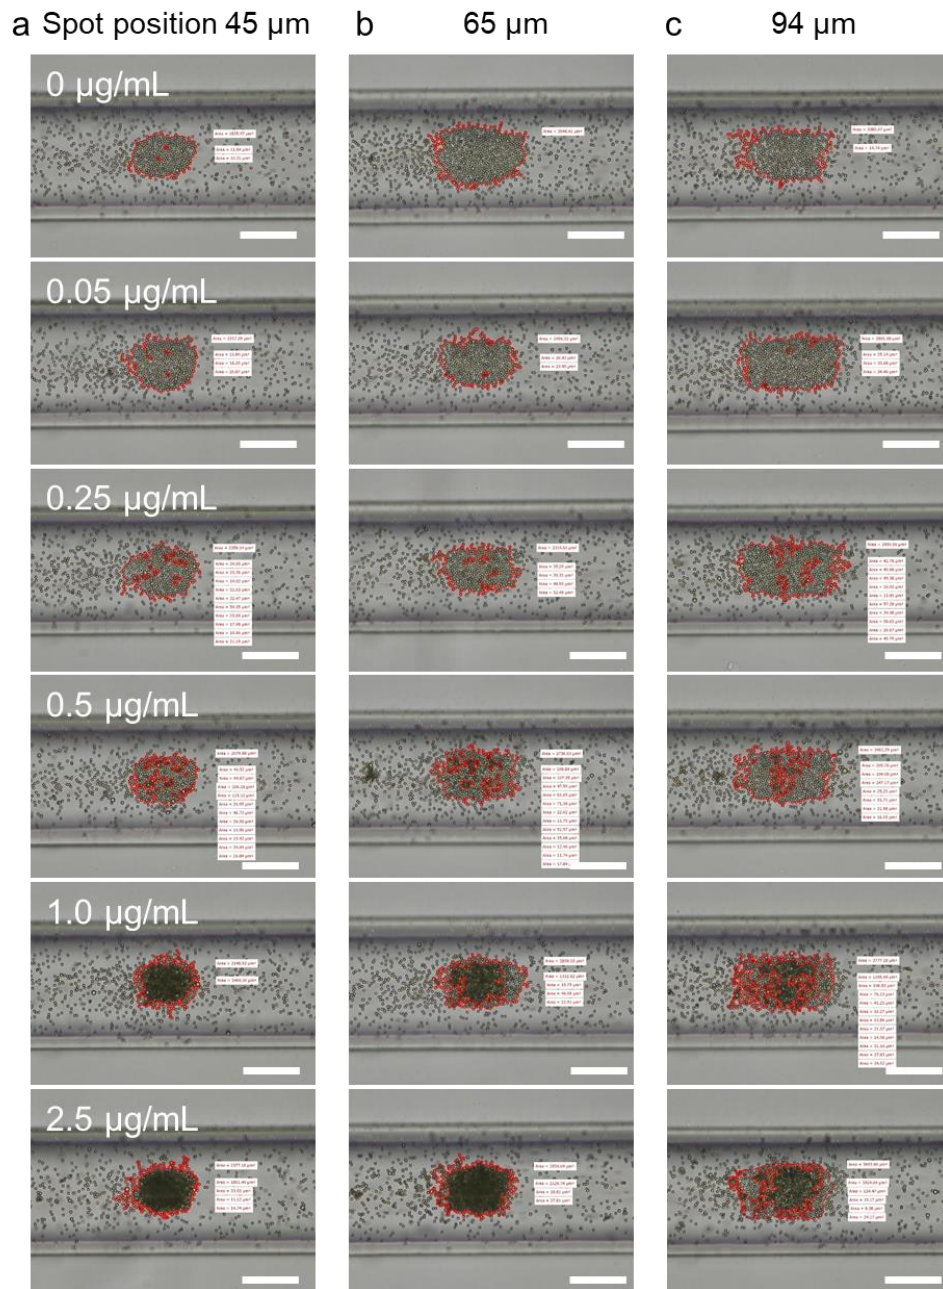

**Figure S5. Light-induced assembly at different laser focusing distances.** Transmission images of light-induced assembly with and without HCT116-derived nanoscale EVs at each focusing distance. (a–c) Images of assembled structures for focusing distance of 45  $\mu\text{m}$ , 65  $\mu\text{m}$ , and 94  $\mu\text{m}$ , respectively, with various concentrations of nanoscale EVs. All scale bars are 50  $\mu\text{m}$ .

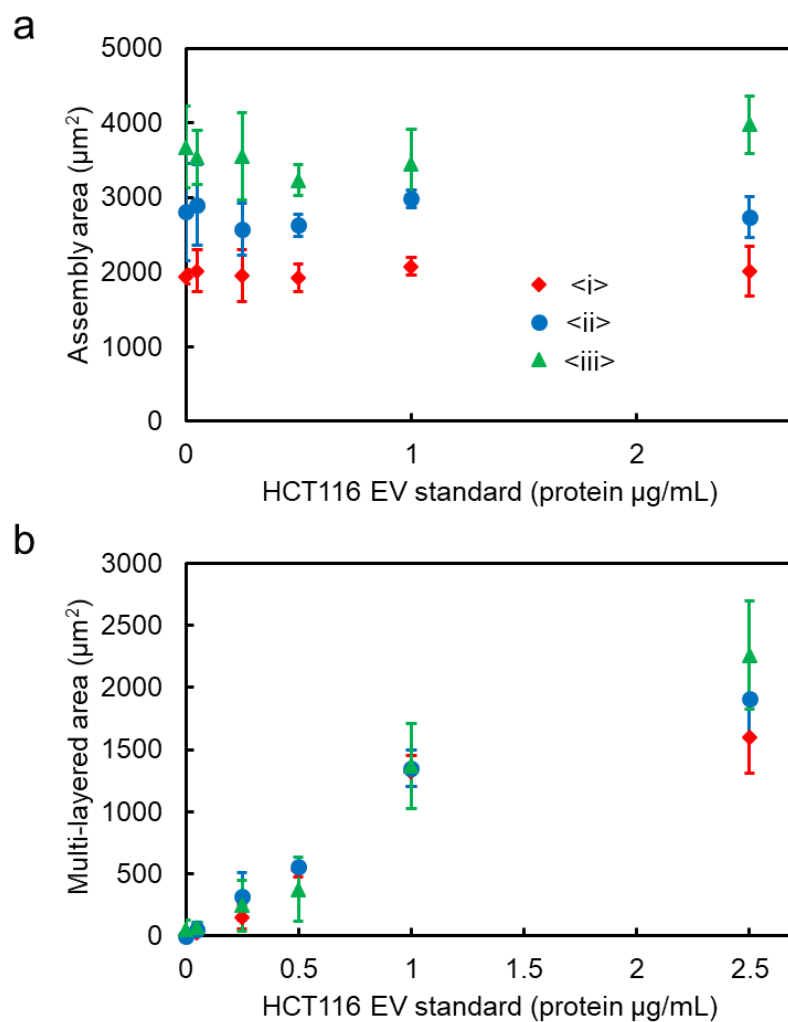

**Figure S6. Size of the aggregate produced by light-induced assembly at different focusing distances.** (a) The assembly area and (b) multi-layered area at each focusing distance are presented in Figure S5 (<i> FD = 45  $\mu\text{m}$ , <ii> FD = 65  $\mu\text{m}$  and <iii> FD = 94  $\mu\text{m}$  in Figure 4a). Error bars present the standard deviations (n = 3) related to Figure 3 and Figure 4 in the main text.

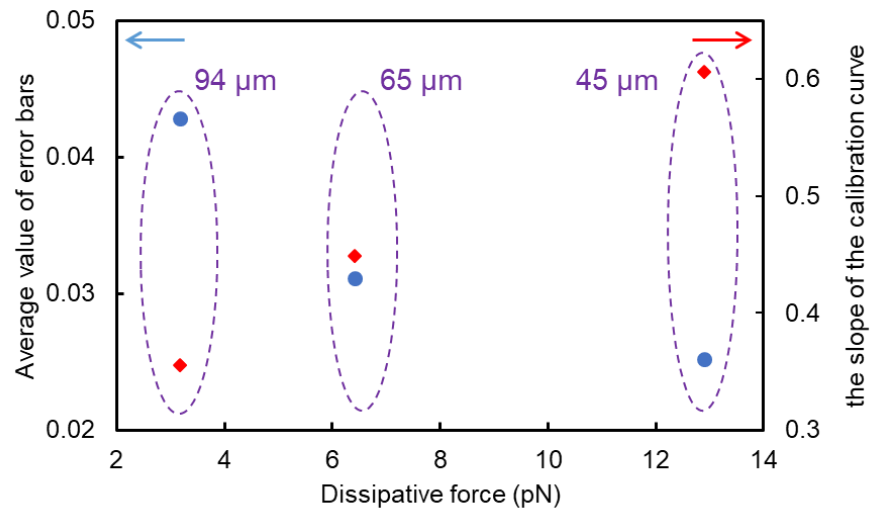

**Figure S7. Evaluation of sensitivity by changing the optical pressure.** Relation of the average value of error bars and the slope of the calibration curve (second vertical axis) in Figure 4b, depending on the dissipative force for a focusing distance (<i>i</i> FD = 45 μm, <ii> FD = 65 μm and <iii> FD = 94 μm in Figure 4a).



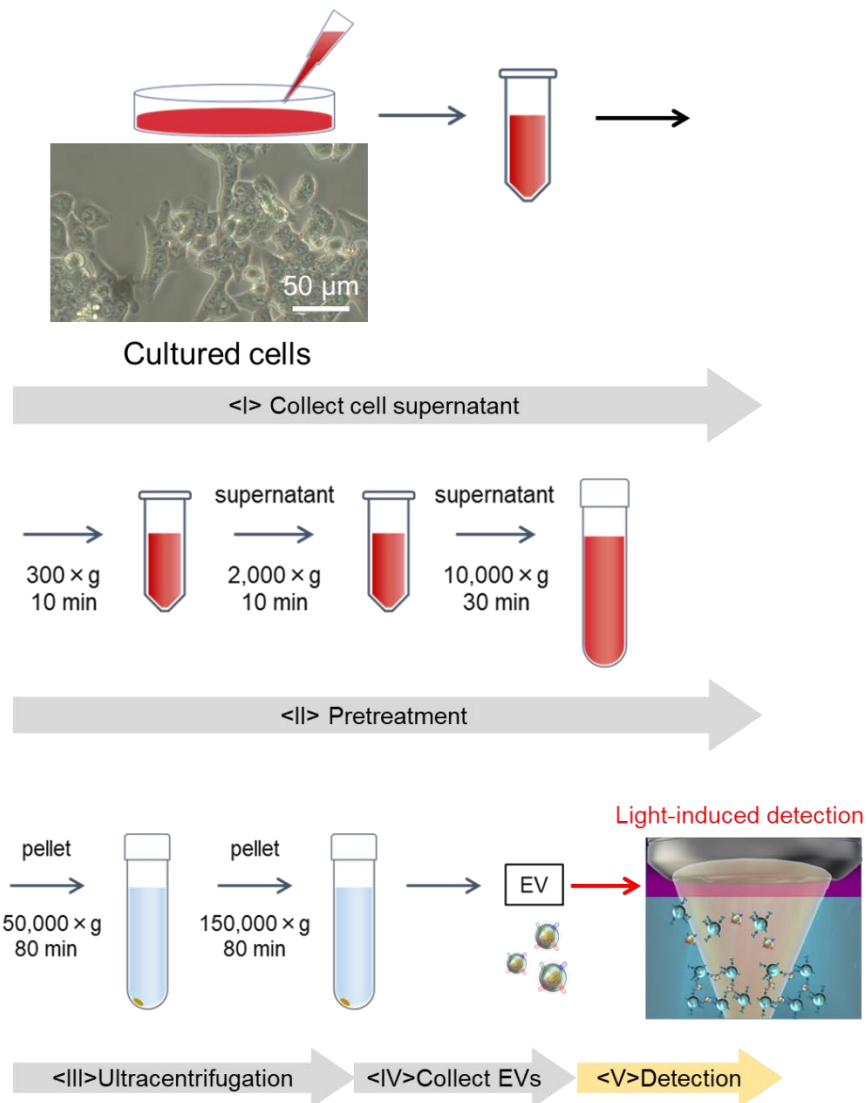

**Figure S8. Schematic image of detection process of nanoscale EVs using the ultracentrifugation.** Whole the process takes over 3.5 hours before the light-induced detection due to the complicated pretreatment processes.

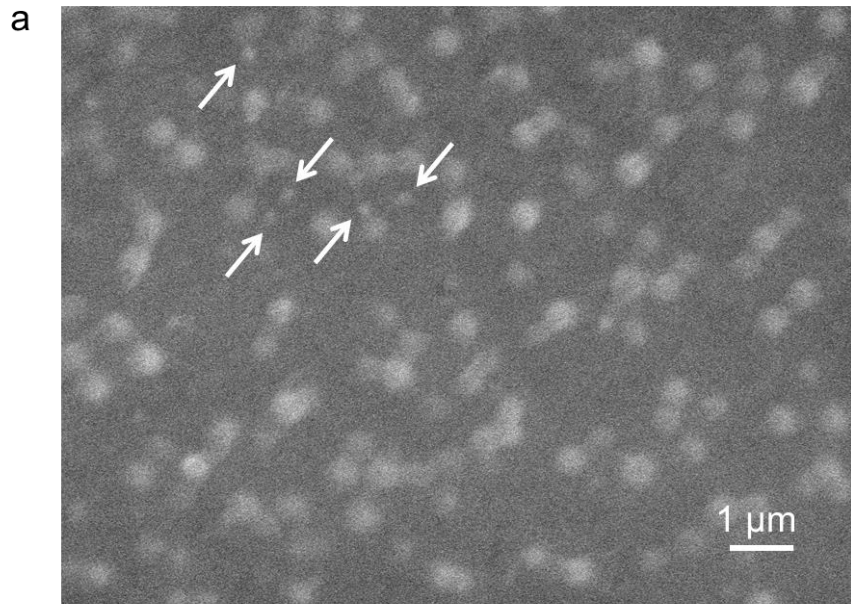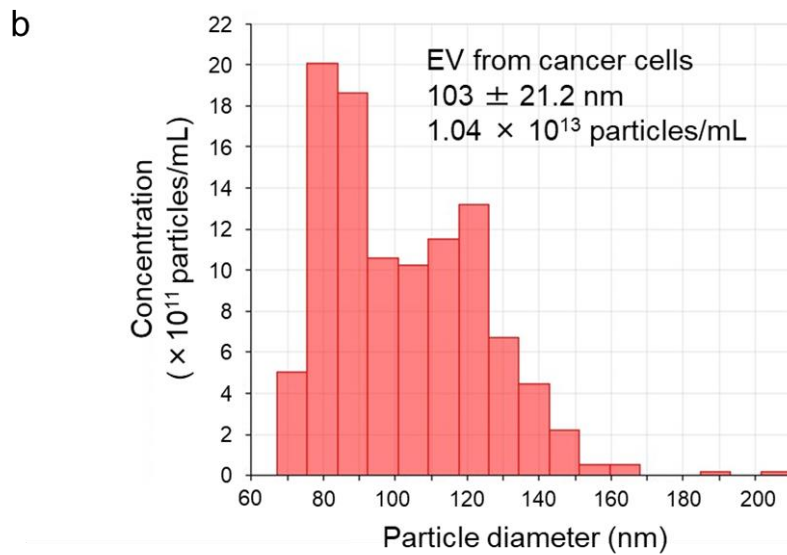

**Figure S9. Scanning electron microscope (SEM) image and results of nanopore measurement of secreted substances in supernatant of cultured HCT116 cells.** (a) Particles in the area between the centre of the droplet and the edge were observed by SEM at a magnification of X10000. Since salt crystals and other substances in the supernatant interfered with observation, the samples were dried after the solvent was replaced with deuterium-depleted water (DDW) for the SEM observation. (b) After the ultracentrifugation, size and concentration of collected EVs were evaluated with a nanoparticle analyser, qNano (IZON S/N 601A, Izon Science, New Zealand).

## Movies for dynamics simulation of probe microparticles

**Movie S1.** Video of the theoretical result for light-induced assembly of microparticles using optical force in the microflow channel, where there is no interparticle binding force. Cohesion energy density:  $0 \text{ J/m}^3$ , volume flow rate:  $0.05 \mu\text{L}/\text{min}$ , laser power:  $265 \text{ mW}$ , focal point from the bottom of the microchannel FD:  $45 \mu\text{m}$ . The laser was irradiated during the initial 3 s and was turned off subsequently. This video corresponds to Figure 5a.

**Movie S2.** Video of the theoretical result for the light-induced assembly of microparticles using optical pressure in the microflow channel, where the interparticle binding force is strong. Cohesion energy density:  $100 \text{ J/m}^3$ , volume flow rate:  $0.05 \mu\text{L}/\text{min}$ , laser power:  $265 \text{ mW}$ , focal point from the bottom of the microchannel FD:  $45 \mu\text{m}$ . The laser was irradiated during the initial 3 s and was turned off subsequently. This video corresponds to Figure 5d.

**Movie S3.** Video of the theoretical result for the light-induced assembly of microparticles using optical pressure in the microflow channel, where there is no interparticle binding force. Cohesion energy density:  $0 \text{ J/m}^3$ , volume flow rate:  $0.05 \mu\text{L}/\text{min}$ , laser power:  $265 \text{ mW}$ , focal point from the bottom of the microchannel FD:  $65 \mu\text{m}$ . The laser was irradiated during the initial 3 s and was turned off subsequently. This video corresponds to Figure 5b.

**Movie S4.** Video of the theoretical result for the light-induced assembly of microparticles using optical pressure in the microflow channel, where the interparticle binding force is strong. Cohesion energy density:  $100 \text{ J/m}^3$ , volume flow rate:  $0.05 \mu\text{L}/\text{min}$ , laser power:  $265 \text{ mW}$ , focal point from the bottom of the microchannel FD:  $65 \mu\text{m}$ . The laser was irradiated during the initial 3 s and was turned off subsequently. This video corresponds to Figure 5e.

**Movie S5.** Video of the theoretical result for the light-induced assembly of microparticles using optical pressure in the microflow channel, where there is no interparticle binding force. Cohesion energy density:  $0 \text{ J/m}^3$ , volume flow rate:  $0.05 \mu\text{L}/\text{min}$ , laser power:  $265 \text{ mW}$ , focal point from the bottom of the microchannel FD:  $94 \mu\text{m}$ . The laser was irradiated during the initial 3 s and was turned off subsequently. This video corresponds to Figure 5c.

**Movie S6.** Video of the theoretical result for the light-induced assembly of microparticles using optical pressure in the microflow channel, where the interparticle binding force is strong. Cohesion energy density:  $100 \text{ J/m}^3$ , volume flow rate:  $0.05 \mu\text{L}/\text{min}$ , laser power:  $265 \text{ mW}$ , focal point from the bottom of the microchannel FD:  $94 \mu\text{m}$ . The laser was irradiated during the initial 3 s and was turned off subsequently. This video corresponds to Figure 5f.
